# Supplementary material
Source: publisher figshare collection journal article supplement (https://acs.figshare.com/ndownloader/files/3947371)
Supplement: Supplementary file 1 [file 3947371]

## Supporting Information

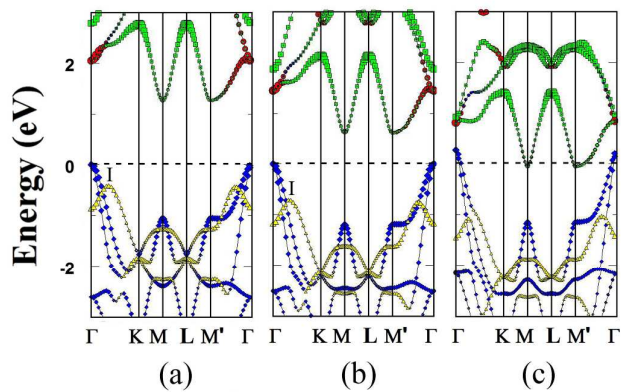

**Figure S1.** Computed electronic band structures of unstrained monolayer (a) HfS<sub>2</sub>, (b) HfSe<sub>2</sub>, and (c) HfTe<sub>2</sub>. The red line denotes  $d_{xy}$ ,  $d_{yz}$ , and  $d_{xz}$  orbitals of Hf atom, the green line denotes  $d_z^2$  and  $d_{x^2-y^2}$  orbitals of Hf atom, the blue line denotes  $p_x$  and  $p_y$  orbitals of S atom, and the yellow line denotes  $p_z$  orbital of S atom. The dashed line represents the Fermi level.

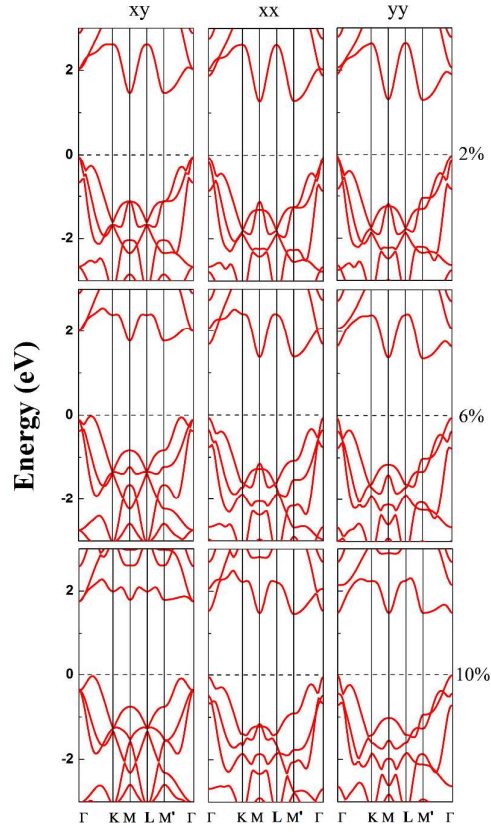

**Figure S2.** Computed band structures of HfS<sub>2</sub> monolayer with respect to the biaxial tensile strain ( $xy$ ), or uniaxial tensile strain in  $x$ -direction ( $xx$ ) or  $y$ -direction ( $yy$ ). The applied strain  $\epsilon = 2\%$  (upper panel),  $6\%$  (middle panel) and  $10\%$  (lower panel).
